# Supplementary material for: A Systematic Review and Meta-Analysis on Hepatitis E Virus Detection in Farmed Ruminants
Source: MDPI journal article supplement (doi:10.3390/pathogens12040550), 2023-04-02
Supplement: s1 [file s1]

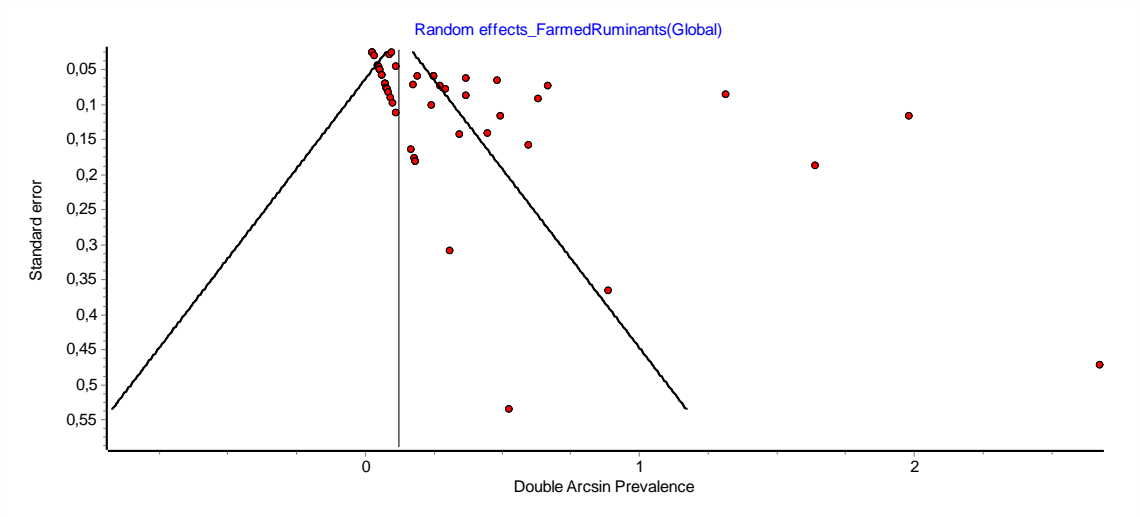

**Figure S1.** Funnel plot results of the global meta-analysis.

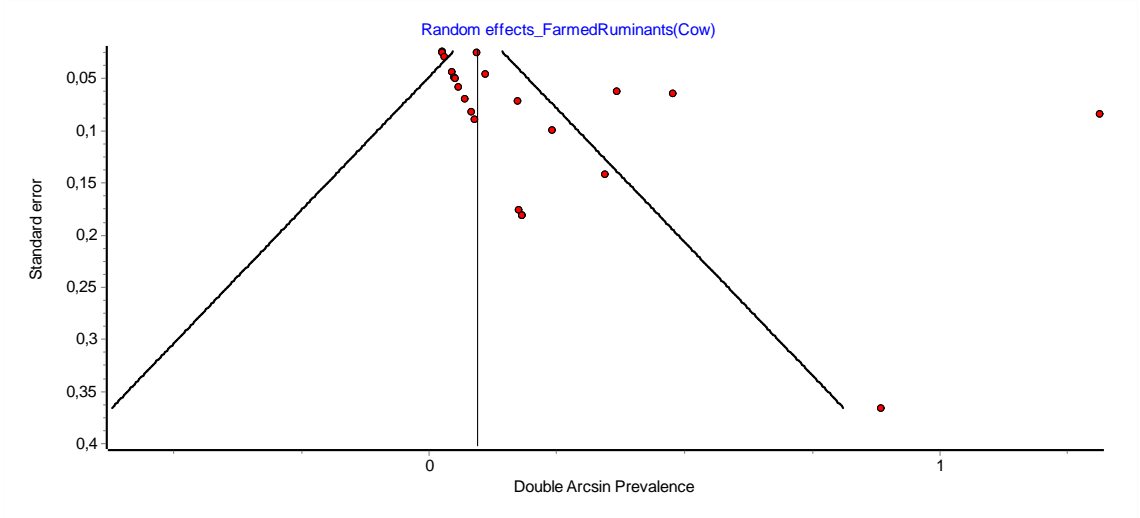

**Figure S2.** Funnel plot results of the cow subgroup meta-analysis.

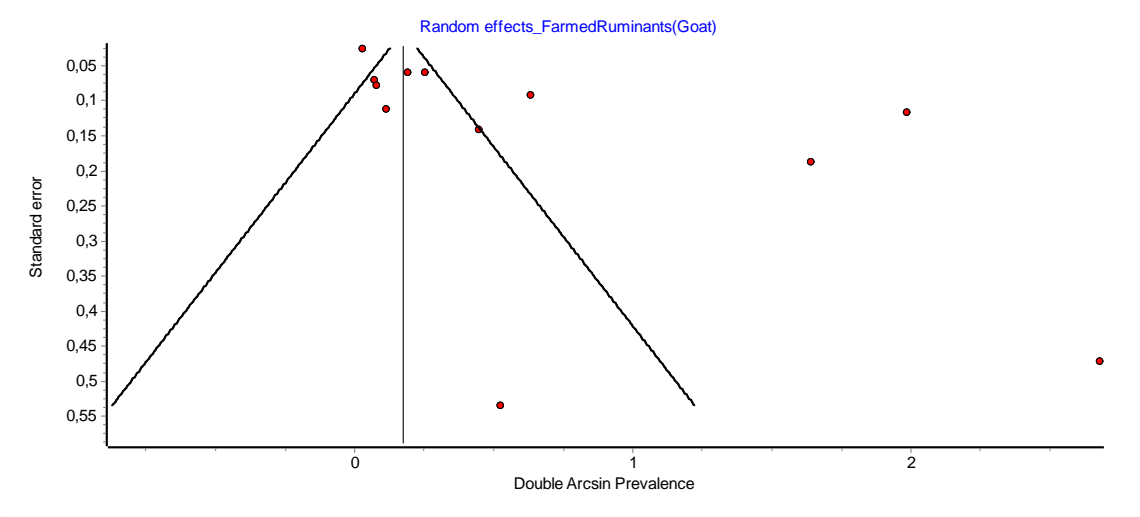

**Figure S3.** Funnel plot results of the goat subgroup meta-analysis.

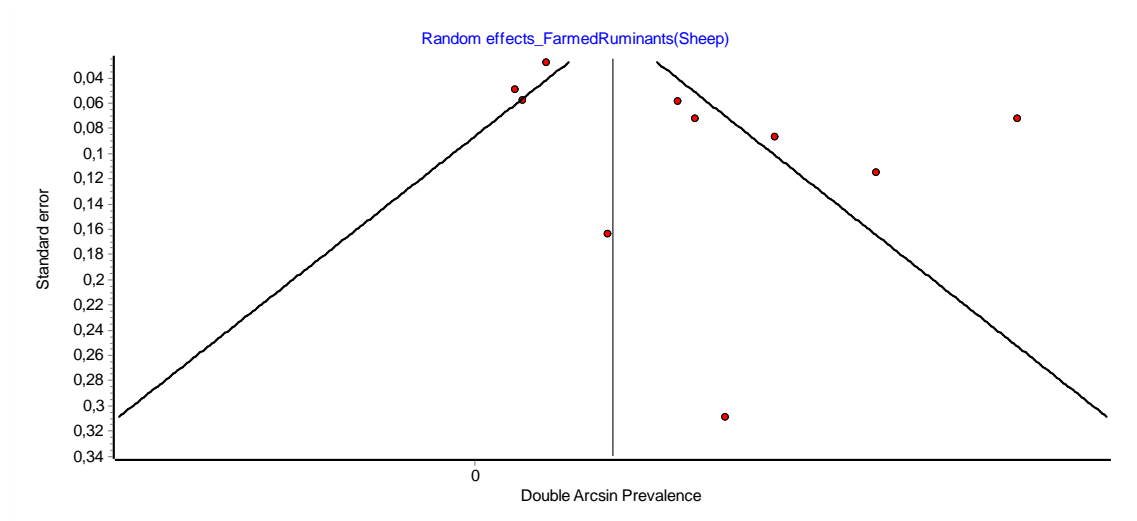

**Figure S4.** Funnel plot results of the sheep subgroup meta-analysis.
